# Supplementary material for: High-resolution melting analysis for SNP genotyping and mapping in tetraploid alfalfa (Medicago sativa L.)
Source: PubMed Central journal article supplement — Mol Breed. 2011 Mar 29;29(2):489–501. doi: 10.1007/s11032-011-9566-x (PMC3275744; doi:10.1007/s11032-011-9566-x), 2011-03-29

**Supplementary Table 1** Diploid and tetraploid mapping populations evaluated using high-resolution melting curve assay

| Population | Parent 1 | Species                                 | Parent 2 | Species                                 | Ploid level | Population type | Progeny evaluated |
|------------|----------|-----------------------------------------|----------|-----------------------------------------|-------------|-----------------|-------------------|
| DIP1       | MS-13    | <i>M. sativa</i> subsp. <i>caerulea</i> | MS-186   | <i>M. sativa</i> subsp. <i>caerulea</i> | Diploid     | F <sub>1</sub>  | 10                |
| DIP2       | P1-4     | <i>M. sativa</i> subsp. <i>caerulea</i> | P6-1     | <i>M. prostrata</i>                     | Diploid     | F <sub>1</sub>  | 12                |
| CHBC       | Chilean  | <i>M. sativa</i> subsp. <i>sativa</i>   | F1-192   | F <sub>1</sub> from Chilean × Wisfal    | Tetraploid  | Backcross       | 16                |
| MFBC       | Wisfal   | <i>M. sativa</i> subsp. <i>falcata</i>  | F1-192   | F <sub>1</sub> from Chilean × Wisfal    | Tetraploid  | Backcross       | 16                |
| AL608      | Altet-4  | <i>M. sativa</i> subsp. <i>sativa</i>   | NECS-141 | <i>M. sativa</i> subsp. <i>sativa</i>   | Tetraploid  | F <sub>1</sub>  | 16                |
| ALNECS     | Altet-4  | <i>M. sativa</i> subsp. <i>sativa</i>   | 95-608   | <i>M. sativa</i> subsp. <i>sativa</i>   | Tetraploid  | F <sub>1</sub>  | 16                |

**Supplementary Table 2** Source, sequence and amplicon size of the primers used for high-resolution melting curve analysis

| Primer Name | Forward                 | Reverse                 | Amplicon Size | LG in the F <sub>1</sub> linkage map | LG in the BC linkage map | Type of Marker | Matching chromosome or BAC ID in Mt V3.5 | MT 3.5 gene ID       |
|-------------|-------------------------|-------------------------|---------------|--------------------------------------|--------------------------|----------------|------------------------------------------|----------------------|
| MTTF063     | CACCTCCTTATATGCGCTGG    | CACGTATAGATGGTGCACGG    | 111           | NA                                   | 2                        | Simplex        | chr02                                    | Medtr2g038590.1      |
| MTTF509     | CATTGTGACAGAGCCTGGG     | TTGTCACCTTGGTAGGGCAT    | 149           | 3                                    | NA                       | Duplex         | chr03                                    | Medtr3g151360.1      |
| MTTF562     | AGGTTGGAGTGGACATATAACCC | CCACCAAGGACCTCTGTTCAT   | 146           | NA                                   | NA                       | Simplex        | chr03                                    | Medtr3g104390.1      |
| MSCWSNP0049 | CAGAATGGAACCTGGAGTTGG   | CATCCATCGCATGACTTCTC    | 100           | NA                                   | 2                        | Simplex        | chr02                                    | IMGA Medtr2g097470.1 |
| MSCWSNP0212 | CGAGAGAGAAGATTGGATTGC   | GAAGAATGGCGGGTTACAGA    | 100           | NA                                   | 2                        | Simplex        | chr02                                    | IMGA Medtr2g075950.1 |
| MSCWSNP0222 | TGTATGGTTCATCAAGGCTCA   | AAGCACTTGCTCCAACAGGTA   | 51            | NA                                   | 3                        | Simplex        | chr03                                    | IMGA Medtr3g070100.1 |
| MSCWSNP0353 | CACAAGCTGAACAGCACCAT    | CACTGGGACCTCCTTTGTTG    | 80            | NA                                   | 6                        | Simplex        | chr06                                    | IMGA Medtr6g023320.1 |
| MSCWSNP0392 | GCTTGGTTGATGAGAAACAG    | CACACAACACTAGCACATCCAA  | 128           | 8                                    | 8                        | Simplex        | chr08                                    | IMGA Medtr4g128750.1 |
| MSCWSNP0402 | TTTGTGTCCTTCTCTGTTTCA   | TGGCATCAAGAGAATGGTAGC   | 89            | 2                                    | 2                        | Duplex         | AC233655.2                               | IMGA AC233655_7.1    |
| MSCWSNP0406 | AACAGGACTGTGTTCACGTA    | CTGCTTCTGCTGATGGACAA    | 86            | 7                                    | NA                       | Simplex        | chr07                                    | IMGA Medtr7g083570.1 |
| MSCWSNP0407 | CCCCTGAGGGTACTCATGC     | AGCTGCAACAACCTCCTCCAT   | 105           | 1                                    | 1                        | Simplex        | chr01                                    | IMGA Medtr1g075610.1 |
| MSCWSNP0413 | GCCAGCTGAGATGAAAGCAT    | CCAGGGACACCTTCAACAAT    | 95            | 3                                    | NA                       | Simplex        | chr03                                    | IMGA Medtr3g118390.1 |
| MSCWSNP0414 | GGAAATCTGGTCTTGCCACT    | CAATACCATCCTCTGACGACTCT | 55            | 2                                    | 2                        | Simplex        | chr02                                    | IMGA Medtr2g029850.1 |
| MSCWSNP0416 | TTGGTCACTCTGAAGCAAACC   | GCGGACCACCAAATAACCT     | 110           | 2                                    | NA                       | Simplex        | chr02                                    | IMGA Medtr2g029800.2 |
| MSCWSNP0420 | ACATTCTTCTGCTCGCCAGT    | GCTGAAGGTGCGAGTTTACC    | 101           | 4                                    | 4                        | Simplex        | chr04                                    | IMGA Medtr4g036260.1 |
| MSCWSNP0427 | AACAACGTCGCCGTAGAGAC    | TTCACCACCAGCGTAAACAA    | 102           | 5                                    | 5                        | Simplex        | chr05                                    | IMGA Medtr5g091060.1 |
| MSCWSNP0429 | CACTACTTGGGTGCAAGCCTA   | GCTTCTACACCACCTGTCCA    | 101           | NA                                   | 7                        | Simplex        | chr07                                    | IMGA Medtr7g111240.1 |
| MSCWSNP0430 | TGGAGGGATAAAGGAGACTCAA  | TGGTTTCAGCGTATTTCCAA    | 170           | 5                                    | 5                        | Simplex        | chr05                                    | IMGA Medtr5g031310.1 |
| MSCWSNP0460 | GGAAATCCCGATCCAACCTCT   | CAAATCGGTGAGGGTGCTAC    | 93            | 2                                    | NA                       | Simplex        | AC234842.1                               | IMGA Medtr2g029850.1 |
| MSCWSNP0466 | TGGTGGCAGCATTAGTTCA     | AACCCAGAGGGACCAATAGC    | 124           | 2                                    | 2                        | Simplex        | chr02                                    | IMGA Medtr2g042130.1 |

NA indicates the marker was not mapped in this population due to lack of polymorphism or segregation pattern suitable for mapping.

**Supplementary Table 3** Genotypes of six tetraploid alfalfa mapping parents amplified by primer MTTF562

| Name     | ----- SNP position (bp) ----- |        |        |        |        |        |        |
|----------|-------------------------------|--------|--------|--------|--------|--------|--------|
|          | SNP 43                        | SNP 44 | SNP 66 | SNP 74 | SNP 79 | SNP 87 | SNP 93 |
| Chilean  | AAAA                          | CCTT   | AAAA   | TTTT   | TTTT   | AAAA   | AAGG   |
| Wisfal   | AATT                          | CCCC   | AAGG   | TTTT   | AACT   | AAGG   | AAGG   |
| F1-192   | AATT                          | CCCT   | AAAG   | TTTT   | ACTT   | AAAG   | AAGG   |
| Altet-4  | AAAA                          | CCCC   | AAAA   | TTTT   | TTTT   | AAAA   | AAAA   |
| NECS-141 | AATT                          | CCCC   | AAAG   | TTTT   | ATTT   | AAAG   | AAGG   |
| 95-608   | AATT                          | CCTT   | AAGG   | CTTT   | AATT   | AAGG   | GGGG   |

**Supplementary Table 4** SNP base positions, genotypes and derived haplotypes of MFBC parents and 16 tetraploid progeny with primer MTF562

| Parents           | ----- SNP position (bp) ----- |        |        |        |        |        | Genotype based on<br>the SNP haplotype |
|-------------------|-------------------------------|--------|--------|--------|--------|--------|----------------------------------------|
|                   | SNP 43                        | SNP 44 | SNP 66 | SNP 79 | SNP 87 | SNP 93 |                                        |
| Wisfal            | AATT                          | CCCC   | AAGG   | AACT   | AAGG   | AAGG   | I, II, IV, V                           |
| F1-192            | AATT                          | CCCT   | AAAG   | ACTT   | AAAG   | AAGG   | I, III, IV, V                          |
| Number of progeny |                               |        |        |        |        |        |                                        |
| 4                 | AATT                          | CCCC   | AAAG   | ACTT   | AAAG   | AAAG   | I, I, IV, V                            |
| 3                 | AATT                          | CCCT   | AAAG   | ACTT   | AAAG   | AAGG   | I, III, IV, V                          |
| 3                 | AATT                          | CCCC   | AAGG   | AACT   | AAGG   | AAGG   | I, II, IV, V                           |
| 2                 | AATT                          | CCCT   | AAGG   | AACT   | AAGG   | AGGG   | II, III, IV, V                         |
| 2                 | AATT                          | CCCC   | AAGG   | AATT   | AAGG   | AAGG   | I, I, V, V                             |
| 1                 | AATT                          | CCCT   | AAGG   | AATT   | AAGG   | AGGG   | I, III, V, V                           |
| 1                 | AATT                          | CCCT   | AAAG   | ACCT   | AAAG   | AAGG   | II, III, IV, IV                        |
| Haplotype         |                               |        |        |        |        |        |                                        |
| I                 | A                             | C      | A      | T      | A      | A      |                                        |
| II                | A                             | C      | G      | A      | G      | G      |                                        |
| III               | A                             | T      | A      | T      | A      | G      |                                        |
| IV                | T                             | C      | A      | C      | A      | A      |                                        |
| V                 | T                             | C      | G      | A      | G      | G      |                                        |

**Supplementary Fig. 1** Normalized melting peaks of ten parents and progeny of six alfalfa mapping populations using primer MTTF509 with three replicates. The amplicon is 145 bp long and covers two SNP sites. Each color represents a different SNP genotype. At MTTF509 SNP 123, AA (2X) and AAAA (4X) = gray, AAAG = green, AG (2X) and AAGG (4X) = red, AGGG = orange, GGGG = blue. At SNP 79, CC (P6-1) and CCCC = blue, and TTTT = all other colors. **A.** MS-13 (gray) × MS-186 (red) and ten progeny (four red and six gray). **B.** P1-4 (gray) × P6-1 (blue) and 12 progeny (all aqua). **C.** Wisfal (orange) × F1-192 (red) and 16 progeny (five orange and eleven red). **D.** Chilean (gray) × F1-192 (red) and 16 progeny (five gray, three red and nine green). **E.** Altet-4 (gray) × NECS-141 (red) and 16 progeny (two red, two gray and twelve green). **F.** Altet-4 (gray) × 95-608 (green) and 16 progeny (seven gray and nine green)

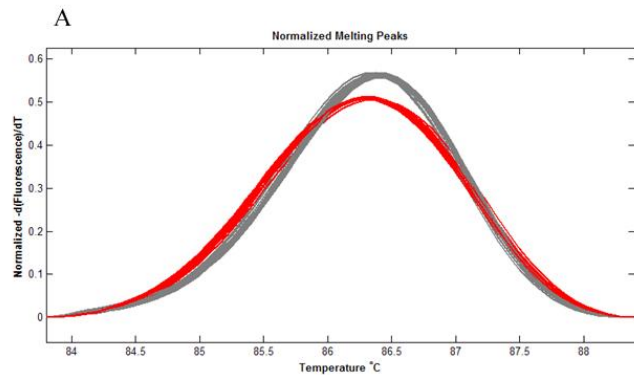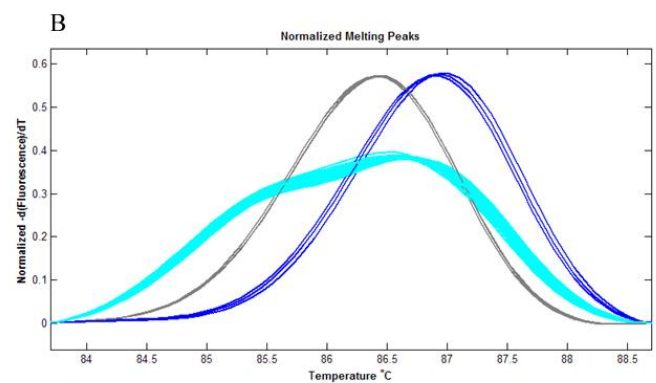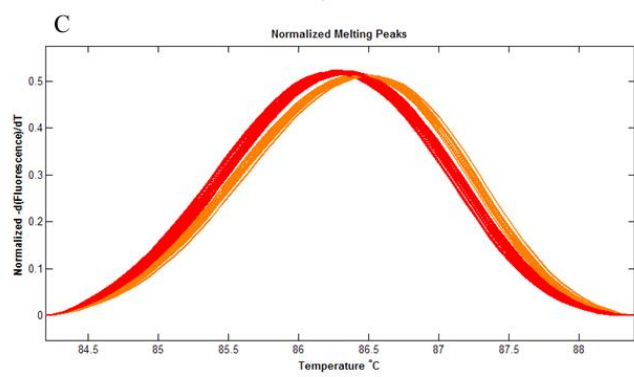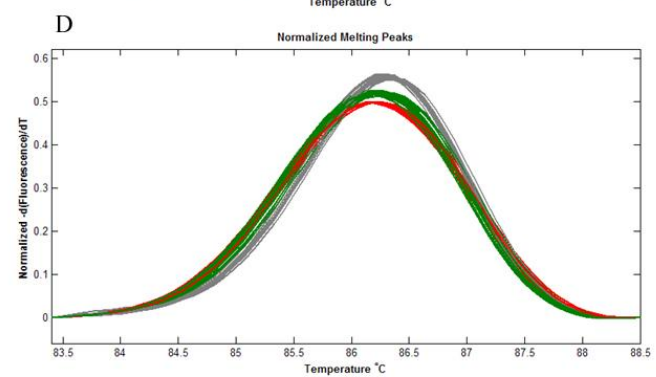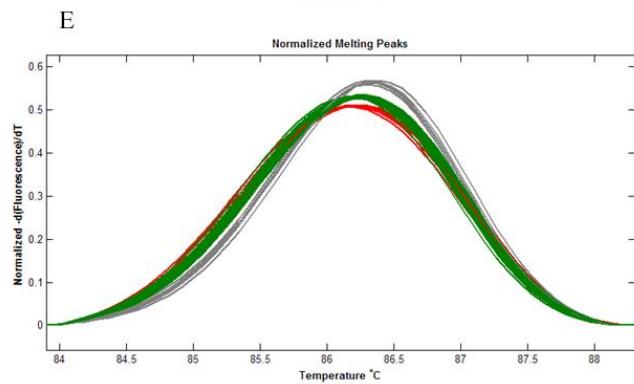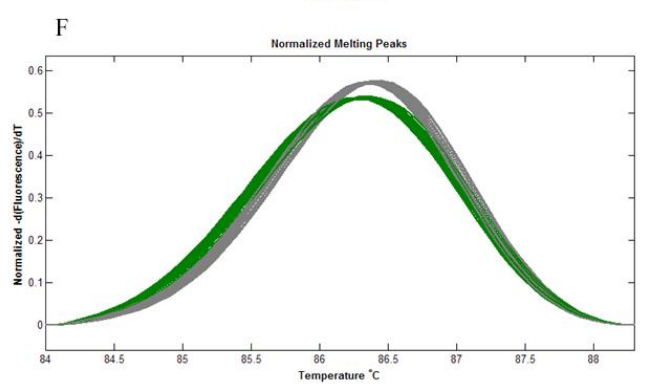

**Supplementary Fig. 2** SNP markers mapped to linkage group 2 in two tetraploid populations (BC and F<sub>1</sub> maps) and the position of their corresponding sequences in the *M. truncatula* physical map V3.5. SNP markers are shown in red and SSR markers are shown in black. Map construction was performed by JoinMap® 3.0 software and map distances calculated using the Kosambi mapping function

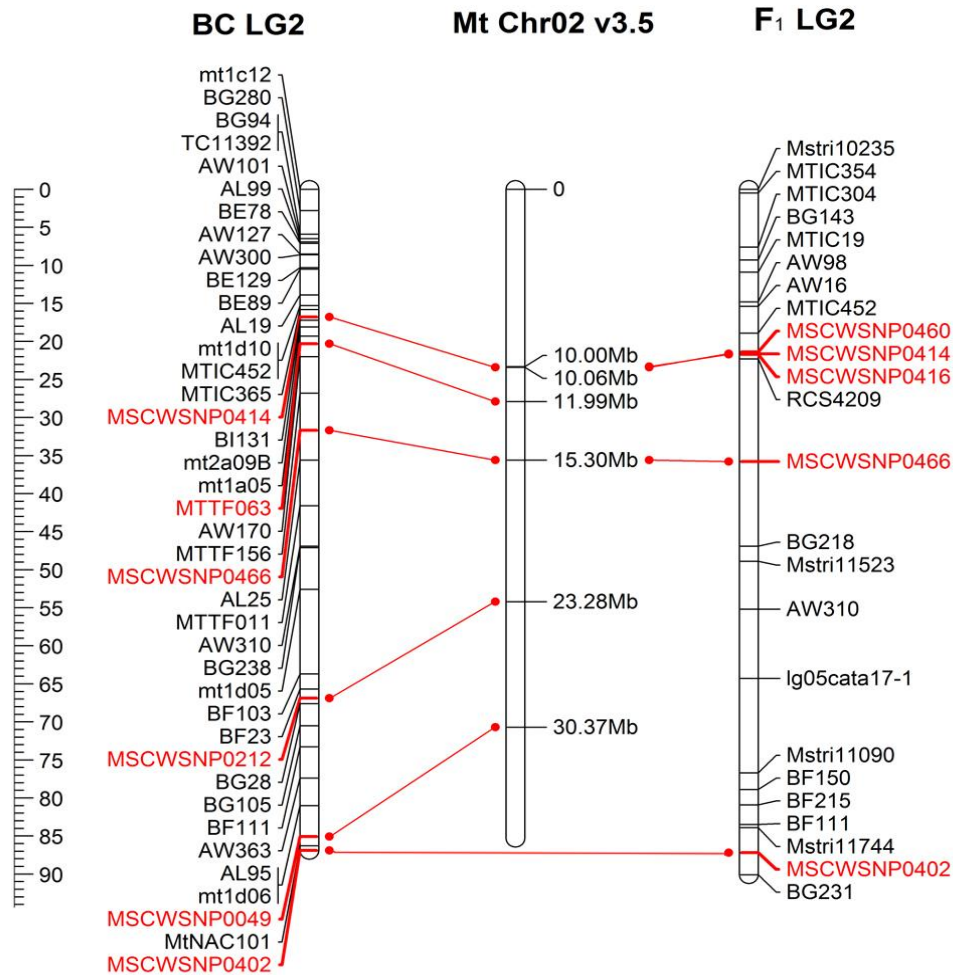

Supplement: 11032_2011_9566_MOESM1_ESM.pdf [file 11032_2011_9566_MOESM1_ESM.pdf]
